# Supplementary material for: UV-promoted radical formation, and near-IR-induced and spontaneous conformational isomerization in monomeric 9-methylguanine isolated in low-temperature Ar matrices
Source: Royal Society of Chemistry journal article supplement (doi:10.1039/c9cp04487f), 2019-01-01
Supplement: c9cp04487f1.pdf [file c9cp04487f1.pdf]

## Electronic Supplementary Information

### **UV-promoted radical formation, and near-IR-induced and spontaneous conformational isomerization in monomeric 9-methylguanine isolated in low-temperature Ar matrices**

Maciej J. Nowak\*<sup>a</sup>, Igor Reva,\*<sup>b</sup>, A. J. Lopes Jesus<sup>c</sup>, Leszek Lapinski,<sup>a</sup> and Rui Fausto<sup>b</sup>

<sup>a</sup>*Institute of Physics, Polish Academy of Sciences, Al. Lotnikow 32/46, 02-668 Warsaw, Poland*

<sup>b</sup>*CQC, Department of Chemistry, University of Coimbra, 3004-535 Coimbra, Portugal*

<sup>c</sup>*CQC, Faculty of Pharmacy, University of Coimbra, 3004-295, Coimbra, Portugal*

**Table S1.** Geometries of twenty-one isomers of 9-methylguanine (**9mG**) optimized at the DFT(B3LYP)/6-31++G(d,p) level of theory and their relative electronic energies ( $\text{kJ mol}^{-1}$ ) calculated at the same level. Color codes: C – grey, H – white, N – blue, O – red.

**Main Canonical Forms**

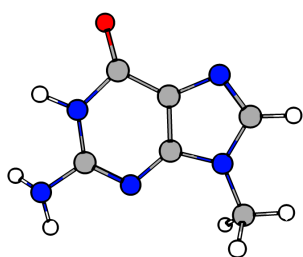

**AO1 (AO)**  
0.00

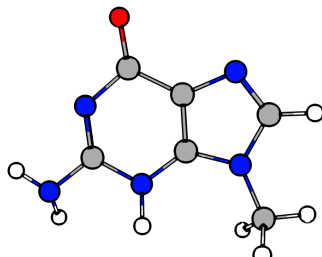

**AO2**  
81.97

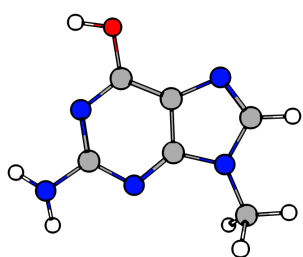

**AH1**  
2.42

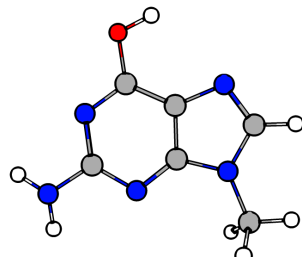

**AH2**  
4.83

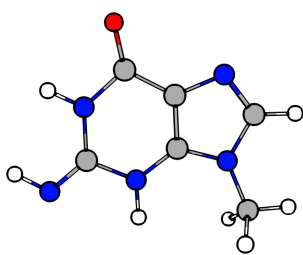

**IO1**  
58.59

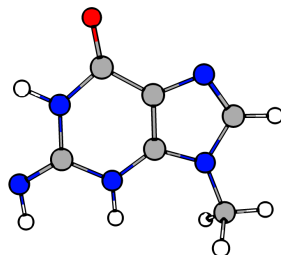

**IO2**  
67.40

**Table S1.** Continued

**High-energy Canonical Forms**

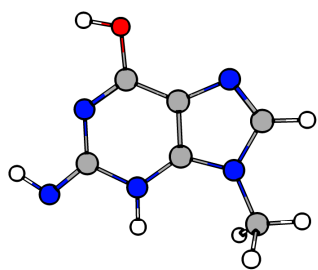

**IH1**

93.55

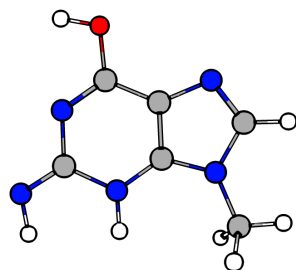

**IH2**

123.53

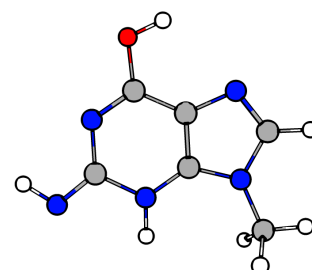

**IH3**

100.30

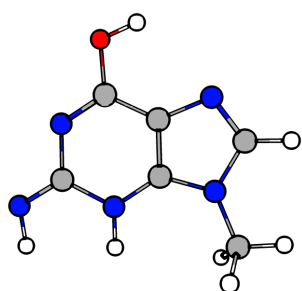

**IH4**

134.25

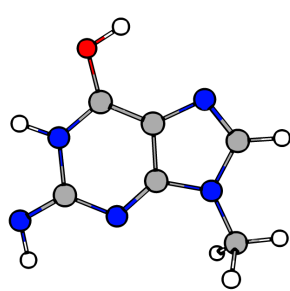

**IH5**

90.66

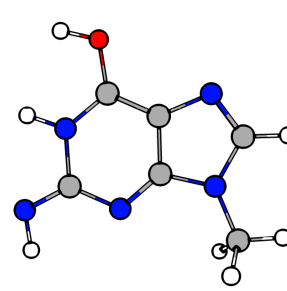

**IH6**

118.36

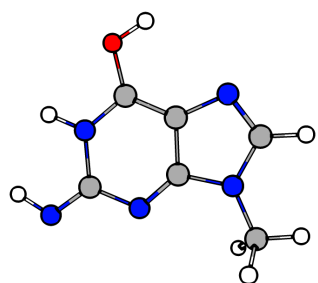

**IH7**

119.84

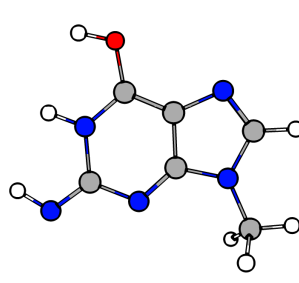

**IH8**

151.66

**Table S1.** Continued

**Non-Canonical Forms**

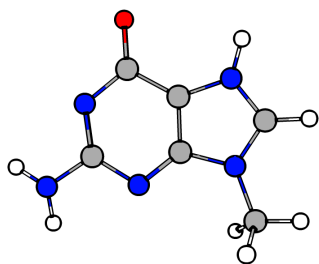

**AO3**

73.11

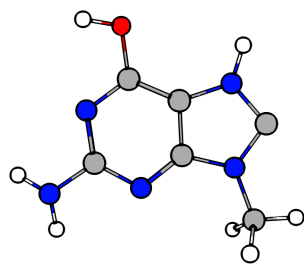

**AH3**

107.21

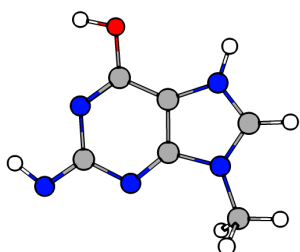

**IH9**

190.84

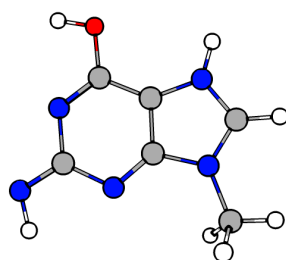

**IH10**

190.27

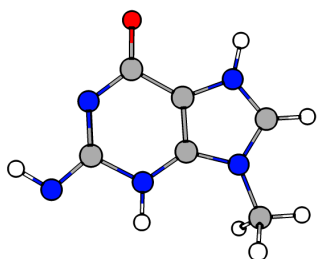

**IO3**

192.35

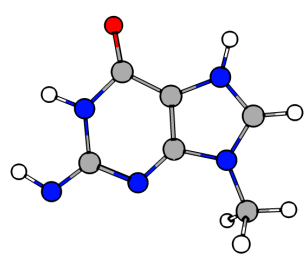

**IO4**

120.74

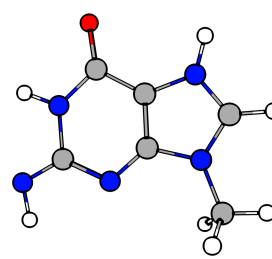

**IO5**

97.65

**Table S2.** comparison of the absorptions observed in the experimental mid-IR spectrum of **9mG** isolated in an Ar matrix at 14 K with the results of harmonic vibrational calculations carried out for the **AO**, **AH1** and **AH2** isomers of this molecule at the B3LYP/6-31++G(d,p) level of theory.

| Experimental<br>(Ar,14 K) <sup>a</sup> | Calculated <sup>b</sup> |     | Assignment <sup>c</sup>                                                                                                        |
|----------------------------------------|-------------------------|-----|--------------------------------------------------------------------------------------------------------------------------------|
|                                        | $\tilde{\nu}$           | I   |                                                                                                                                |
| 3576                                   | 3585                    | 87  | $\nu$ OH ( <b>AH2</b> )                                                                                                        |
| 3571                                   | 3562                    | 50  | $\nu_a$ NH <sub>2</sub> ( <b>AH2</b> )                                                                                         |
| 3568                                   | 3574                    | 92  | $\nu$ OH ( <b>AH1</b> )                                                                                                        |
| 3565                                   | 3557                    | 44  | $\nu_a$ NH <sub>2</sub> ( <b>AH1</b> )                                                                                         |
| 3543/3535                              | 3515                    | 39  | $\nu_a$ NH <sub>2</sub> ( <b>AO</b> )                                                                                          |
| 3460/3454                              | 3434                    | 83  | $\nu_s$ NH <sub>2</sub> ( <b>AH2</b> )                                                                                         |
| 3458/3452                              | 3431                    | 72  | $\nu_s$ NH <sub>2</sub> ( <b>AH1</b> )                                                                                         |
| 3440/3435                              | 3419                    | 51  | $\nu$ N1H ( <b>AO</b> )                                                                                                        |
| 3430/3427                              | 3404                    | 49  | $\nu_s$ NH <sub>2</sub> ( <b>AO</b> )                                                                                          |
| 1752/1741                              | 1758                    | 784 | $\nu$ C=O ( <b>AO</b> )                                                                                                        |
| 1656                                   |                         |     | ( <b>AH1</b> )                                                                                                                 |
| 1652                                   |                         |     | ( <b>AH2</b> )                                                                                                                 |
| 1643/1640                              | 1646                    | 441 | $\nu$ C <sub>5</sub> C <sub>6</sub> ; $\nu$ C <sub>4</sub> N <sub>3</sub> ( <b>AH1</b> )                                       |
| 1640/1634                              | 1645                    | 494 | $\nu$ C <sub>4</sub> N <sub>3</sub> ; $\nu$ C <sub>6</sub> N <sub>1</sub> ( <b>AH2</b> )                                       |
| 1622                                   | 1633                    | 473 | $\nu$ C <sub>2</sub> N <sub>3</sub> ; $\delta$ NH <sub>2</sub> ( <b>AO</b> )                                                   |
| 1608                                   | 1607                    | 181 | $\nu$ C <sub>2</sub> N <sub>10</sub> ; $\delta$ NH <sub>2</sub> ( <b>AH1</b> )                                                 |
|                                        | 1606                    | 229 | $\nu$ C <sub>2</sub> N <sub>10</sub> ; $\delta$ NH <sub>2</sub> ( <b>AH2</b> )                                                 |
| 1598/1592                              | 1590                    | 494 | $\nu$ C <sub>4</sub> N <sub>3</sub> ; $\nu$ C <sub>6</sub> N <sub>1</sub> ( <b>AH2</b> )                                       |
| 1593/1589/1584                         | 1592                    | 430 | $\nu$ C <sub>4</sub> N <sub>3</sub> ; $\nu$ C <sub>4</sub> C <sub>5</sub> ( <b>AH1</b> )                                       |
| 1582                                   | 1587                    | 218 | $\nu$ C <sub>2</sub> N <sub>3</sub> ( <b>AO</b> )                                                                              |
| 1575                                   |                         |     | ( <b>AO</b> )                                                                                                                  |
| 1561                                   | 1559                    | 112 | $\nu$ C <sub>4</sub> C <sub>5</sub> ; $\nu$ C <sub>4</sub> N <sub>3</sub> ( <b>AO</b> )                                        |
| 1540                                   | 1539                    | 111 | $\nu$ C <sub>8</sub> N <sub>7</sub> ; $\nu$ C <sub>4</sub> N <sub>9</sub> ( <b>AO</b> )                                        |
| 1524                                   | 1526                    | 68  | $\nu$ C <sub>8</sub> N <sub>7</sub> ; $\nu$ C <sub>4</sub> N <sub>9</sub> ( <b>AH1</b> )                                       |
| 1522                                   | 1522                    | 34  | $\nu$ C <sub>8</sub> N <sub>7</sub> ; $\nu$ C <sub>4</sub> N <sub>9</sub> ( <b>AH2</b> )                                       |
| 1492                                   | 1494                    | 43  | $\delta$ CH <sub>3</sub> as; $\nu$ C <sub>6</sub> N <sub>1</sub> ( <b>AH2</b> )                                                |
| 1483                                   | 1490                    | 32  | $\delta$ CH <sub>3</sub> as; $\nu$ C <sub>6</sub> N <sub>1</sub> ( <b>AH1</b> )                                                |
| 1472                                   | 1480                    | 42  | $\nu$ C <sub>6</sub> N <sub>1</sub> ; $\nu$ C <sub>4</sub> N <sub>3</sub> ( <b>AH2</b> )                                       |
| 1467/1465                              | 1472                    | 161 | $\nu$ C <sub>6</sub> N <sub>1</sub> ; $\nu$ C <sub>8</sub> N <sub>7</sub> ( <b>AH1</b> )                                       |
| 1448/1445                              | 1450                    | 85  | $\nu$ C <sub>6</sub> N <sub>10</sub> ; $\nu$ C <sub>8</sub> N <sub>7</sub> ( <b>AH2</b> )                                      |
| 1441/1440                              | 1446                    | 79  | $\nu$ C <sub>8</sub> N <sub>7</sub> ; $\nu$ C <sub>4</sub> N <sub>9</sub> ( <b>AH1</b> )                                       |
| 1437/1435                              | 1442                    | 117 | $\nu$ C <sub>2</sub> N <sub>10</sub> ( <b>AH1</b> )                                                                            |
| 1434/1431                              | 1440                    | 109 | $\delta$ CH <sub>3</sub> s ( <b>AH2</b> )                                                                                      |
| 1415/1412                              | 1416                    | 116 | $\delta$ CH <sub>3</sub> s ( <b>AH1</b> )                                                                                      |
| 1409/1408                              | 1412                    | 149 | $\nu$ C <sub>4</sub> C <sub>5</sub> ; $\nu$ C <sub>8</sub> N <sub>7</sub> ( <b>AH2</b> )                                       |
| 1376/1373                              | 1369                    | 42  | $\nu$ C <sub>5</sub> C <sub>6</sub> ( <b>AO</b> )                                                                              |
| 1336                                   | 1330                    | 19  | $\nu$ C <sub>8</sub> N <sub>9</sub> ; $\nu$ C <sub>5</sub> N <sub>7</sub> ( <b>AO</b> )                                        |
| 1333                                   | 1331                    | 48  | $\nu$ C <sub>8</sub> N <sub>9</sub> ; $\nu$ C <sub>8</sub> N <sub>7</sub> ( <b>AH2</b> )                                       |
| 1329                                   | 1328                    | 34  | $\nu$ C <sub>4</sub> C <sub>5</sub> ( <b>AH1</b> )                                                                             |
| 1310                                   | 1306                    | 51  | $\delta$ N <sub>1</sub> H ( <b>AO</b> )                                                                                        |
| 1298                                   | 1294                    | 86  | $\nu$ C <sub>5</sub> N <sub>7</sub> ; $\nu$ C <sub>4</sub> N <sub>3</sub> ; $\nu$ C <sub>8</sub> N <sub>9</sub> ( <b>AH2</b> ) |
| 1283/1275                              | 1281                    | 234 | $\delta$ OH ( <b>AH2</b> )                                                                                                     |
| 1280/1277                              | 1286                    | 37  | $\nu$ C <sub>4</sub> N <sub>3</sub> ; $\nu$ C <sub>4</sub> N <sub>9</sub> ; $\nu$ C <sub>8</sub> N <sub>9</sub> ( <b>AH1</b> ) |

**Table S2.** Continued

| Experimental<br>(Ar, 14 K) <sup>a</sup> | Calculated <sup>b</sup> |     | Assignment <sup>c</sup>                                  |
|-----------------------------------------|-------------------------|-----|----------------------------------------------------------|
|                                         | $\tilde{\nu}$           | I   |                                                          |
| 1239                                    | 1222                    | 12  | $\delta C_8H$ ( <b>AO</b> )                              |
| 1225/1222                               | 1221                    | 42  | $\delta C_8H$ ( <b>AH1</b> )                             |
| 1205                                    |                         |     | ( <b>AH1</b> )                                           |
| 1174                                    | 1195                    | 184 | $\delta OH$ ( <b>AH1</b> )                               |
| 1137                                    | 1124                    | 59  | $\nu C_2N_3$ ; $\nu C_5N_7$ ; $\nu C_6N_1$ ( <b>AO</b> ) |
| 1083/1080                               | 1080                    | 20  | $\rho NH_2$ ; $\nu C_2N_3$ ( <b>AH1</b> )                |
| 1054                                    | 1048                    | 10  | $\nu CO$ ; $\nu C_2N_3$ ( <b>AH1</b> )                   |
| 1052                                    | 1046                    | 36  | $\nu CO$ ; $\nu C_2N_3$ ( <b>AH2</b> )                   |
| 1048                                    | 1039                    | 41  | $\rho CH_3$ ( <b>AO</b> )                                |
| 1045/1044                               | 1039                    | 45  | $\rho CH_3$ ( <b>AH2</b> )                               |
| 1025                                    |                         |     | ( <b>AO</b> )                                            |
| 1013                                    | 1007                    | 17  | $\delta$ ring ( <b>AO</b> )                              |
| 1005                                    | 994                     | 76  | $\delta$ ring ( <b>AH1</b> )                             |
| 1002                                    | 993                     | 12  | $\delta$ ring ( <b>AH2</b> )                             |
| 988                                     |                         |     | ( <b>AH1</b> )                                           |
| 794                                     | 773                     | 24  | $\gamma$ ring ( <b>AH2</b> )                             |
| 792                                     | 777                     | 23  | $\gamma$ ring ( <b>AH1</b> )                             |
| 777                                     | 750                     | 17  | $\gamma$ ring ( <b>AO</b> )                              |
| 726                                     | 719                     | 10  | $\delta$ ring ( <b>AH2</b> )                             |
| 725                                     | 718                     | 16  | $\delta$ ring ( <b>AH1</b> )                             |
| 722                                     | 716                     | 24  | $\delta$ ring ( <b>AO</b> )                              |
| 691/695                                 | 681                     | 32  | $\gamma$ ring ( <b>AO</b> )                              |
| 673/668                                 | 667                     | 18  | $\delta N_{10}C_2N$ ; $\delta OCN$ ( <b>AH2</b> )        |
| 662                                     | 664                     | 22  | $\delta N_{10}C_2N$ ; $\delta OCN$ ( <b>AO</b> )         |
| 643/642                                 | 637                     | 26  | $\gamma$ ring ( <b>AO</b> )                              |
| 634                                     | 631                     | 34  | $\gamma$ ring ( <b>AH1</b> )                             |
| 631                                     | 626                     | 15  | $\gamma$ ring ( <b>AH2</b> )                             |
| 586                                     | 583                     | 72  | $\gamma N_1H$ ( <b>AO</b> )                              |
| 513/510                                 | 535                     | 96  | $\tau OH$ ( <b>AH1</b> )                                 |
| 507                                     | 517                     | 111 | $\tau OH$ ( <b>AH2</b> )                                 |

<sup>a</sup> Observed wavenumbers in  $cm^{-1}$ . <sup>b</sup> Calculated wavenumbers ( $\tilde{\nu}$ ,  $cm^{-1}$ ) are scaled by 0.95 and 0.98, above and below  $3000\text{ cm}^{-1}$ , respectively, and calculated infrared intensities (I) are expressed in  $km\text{ mol}^{-1}$ . <sup>c</sup> Assigning the experimental bands to a specific form was helped by the spectral changes resulting from the selective NIR irradiations and dark kinetics. Description of the vibrational modes was based on the vibrational analysis provided by the VibAnalysis software,<sup>S1</sup> supported by animation of the vibrations using the ChemCraft software.<sup>S2</sup> Abbreviations:  $\nu$ , stretching;  $\delta$ , in-plane deformation;  $\gamma$ , out-of-plane deformation  $\rho$ , rocking;  $\tau$ , torsion; s, symmetric; a, antisymmetric. Experimental absorptions that do not have counterparts in harmonic vibrational calculations are assigned as (**AH1**), (**AH2**) or (**AO**), depending on their behaviour upon the NIR irradiations and dark kinetics. See Figure S1 for the atom numbering scheme.

Supporting References:

- S1. G. A. Zhurko *Chemcraft - Graphical Program for Visualization of Quantum Chemistry Computations*, Version 1.8; <http://www.chemcraftprog.com>, 2015.
- S2. (a) F. Teixeira, *VibAnalysis - Tools for performing vibrational analysis on molecular systems*, <https://github.com/teixeirafilipe/vibAnalysis>, 2019; (b) F. Teixeira and M. Cordeiro, *J. Chem. Theory Comput.*, 2019, **15**, 456-470.

**Table S3.** Anharmonic wavenumbers ( $\tilde{\nu}$ , unscaled) and IR intensities (I) calculated for first overtones of the OH, NH and NH<sub>2</sub> stretching vibrations, and combination tones involving the symmetric and antisymmetric NH<sub>2</sub> stretching vibrations. Anharmonic vibrational calculations were carried out at the B3LYP/6-31++G(d,p) level of theory for the **AO**, **AH1** and **AH2** isomeric forms of **9mG**.

| Isomer     | Vibrational mode                  | $\tilde{\nu} / \text{cm}^{-1}$ | I / km mol <sup>-1</sup> |
|------------|-----------------------------------|--------------------------------|--------------------------|
| <b>AO</b>  | 2 $\nu_a$ NH <sub>2</sub>         | 6981.221                       | 2.341                    |
|            | ( $\nu_a+\nu_s$ ) NH <sub>2</sub> | 6826.379                       | 2.099                    |
|            | 2 $\nu_s$ NH <sub>2</sub>         | 6799.100                       | 2.389                    |
|            | 2 $\nu$ N1H                       | 6726.461                       | 2.992                    |
| <b>AH1</b> | 2 $\nu_a$ NH <sub>2</sub>         | 7091.334                       | 2.316                    |
|            | 2 $\nu$ OH                        | 6964.016                       | 6.389                    |
|            | ( $\nu_a+\nu_s$ ) NH <sub>2</sub> | 6917.521                       | 1.987                    |
|            | 2 $\nu_s$ NH <sub>2</sub>         | 6870.379                       | 1.981                    |
| <b>AH2</b> | 2 $\nu_a$ NH <sub>2</sub>         | 7106.455                       | 2.340                    |
|            | 2 $\nu$ OH                        | 7000.517                       | 4.270                    |
|            | ( $\nu_a+\nu_s$ ) NH <sub>2</sub> | 6928.913                       | 2.012                    |
|            | 2 $\nu_s$ NH <sub>2</sub>         | 6878.006                       | 1.994                    |

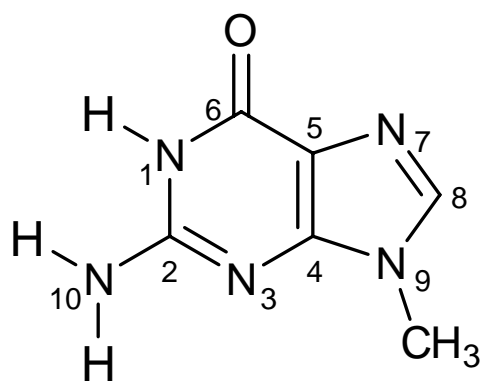

**Figure S1.** Molecular structure of 9-methylguanine (**9mG**) in the amino-oxo (**AO**) form, including the numbering of selected atoms.



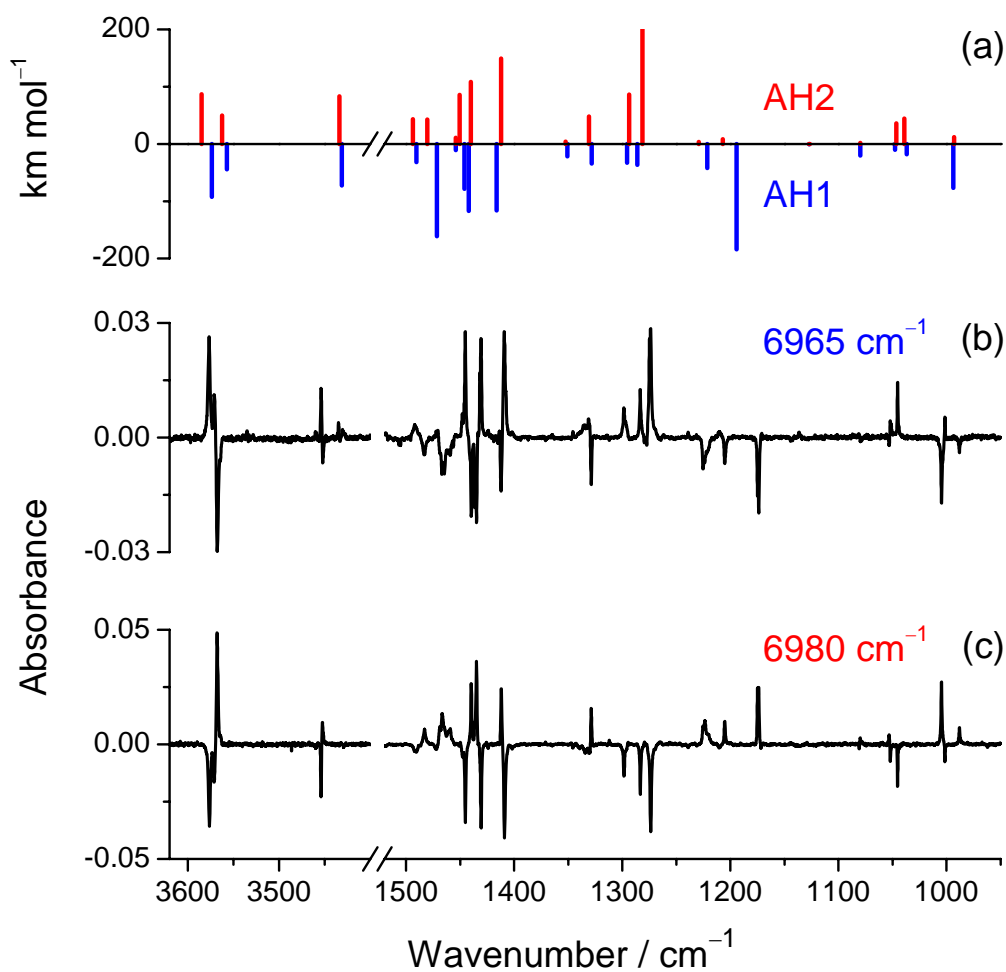

**Figure S2.** (a) Mid-IR spectra of (red) **AH2** and (blue) **AH1** conformers of the amino-hydroxy tautomer of 9-methylguanine (**9mG**) theoretically calculated at the DFT(B3LYP)/6-31++G(d,p) level. The IR intensities computed for **AH1** were multiplied by  $-1$ . The theoretical wavenumbers were scaled by 0.98; (b) experimental difference spectrum: the spectrum recorded after irradiation of matrix-isolated **9mG** at  $6965\text{ cm}^{-1}$  minus the spectrum recorded before that irradiation; (c) experimental difference spectrum: the spectrum recorded after irradiation of matrix-isolated **9mG** at  $6980\text{ cm}^{-1}$  minus the spectrum recorded before that irradiation.

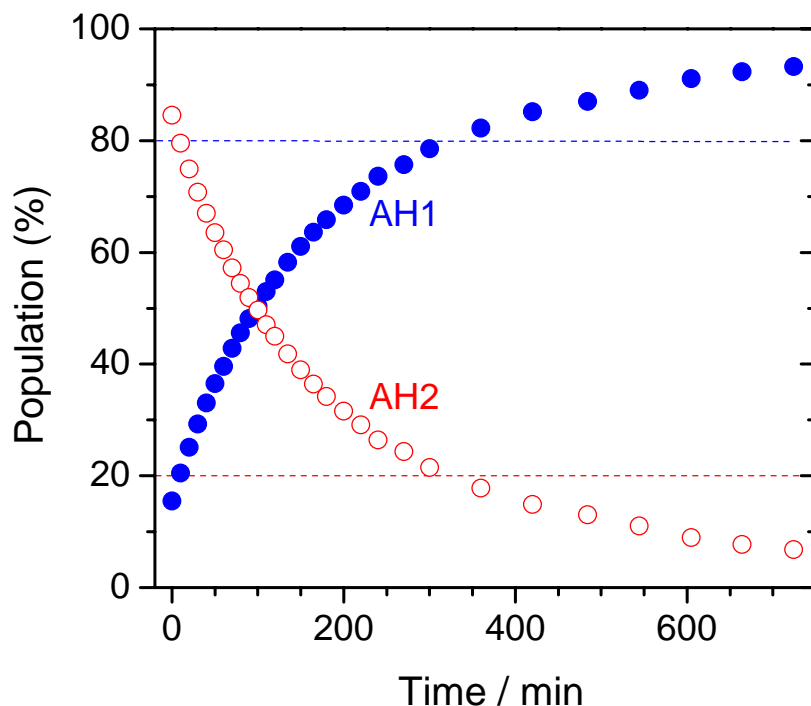

**Figure S3.** Time evolution of the populations of the **AH1** (closed blue circles) and **AH2** (open red circles) conformers of **9mG** trapped in an Ar matrix at 12 K by keeping the matrix in dark for 720 minutes. The initial conformational composition was obtained by irradiating the matrix at wavenumbers within the 6966-6956  $\text{cm}^{-1}$  range for several minutes. The populations of the two forms were estimated from integration of the 1448/1445 (**AH2**) and 1441/1440 (**AH1**) pairs of doublets. Horizontal dashed lines represent the relative abundances estimated for the two conformers (**AH1** : **AH2** relates as 80 : 20) at the photostationary state (compare with Fig. 6 of the main text).

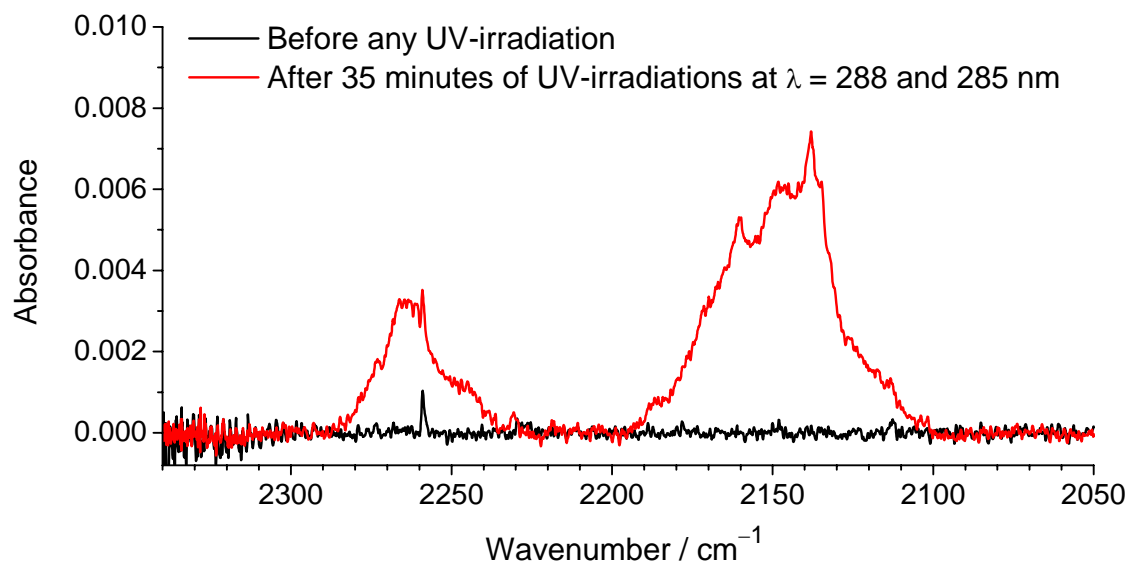

**Figure S4.** Fragment of the IR spectra of **9mG** isolated in an argon matrix: (black) the spectrum recorded before any UV-irradiation; (red) the spectrum recorded after 35 minutes of UV-irradiations at  $\lambda = 288$  and  $285$  nm. The higher- and lower-frequency bands are spectral indications of formation of open-ring isocyanates and ketenes, respectively. The lower-frequency band may also include the contribution of carbon monoxide generated in photodecomposition processes.
